# Supplementary material
Source: PubMed Central journal article supplement (PMC4411085)
Supplement: NIHMS681437-supplement-Supplemental_Table.pdf [file NIHMS681437-supplement-Supplemental_Table.pdf]

Supplemental table: Genetics and pathology of ALS and FTD.

Ling et al (2013) Neuron

| Disease            | Locus     | Gene (protein)                                 | Protein function        | Heredity    | Onset           | fALS % | sALS % | FTD % | Pathology | Other diseases | Ref   |
|--------------------|-----------|------------------------------------------------|-------------------------|-------------|-----------------|--------|--------|-------|-----------|----------------|-------|
| <b>Typical ALS</b> |           |                                                |                         |             |                 |        |        |       |           |                |       |
| <b>ALS1</b>        | 21q22.1   | <i>SOD1</i><br>(Superoxide dismutase)          | Detoxification enzyme   | AD          | Adult           | 20%    | 2%     | -     | SOD1      |                | 1     |
| <b>ALS6</b>        | 16-11.2   | <i>FUS</i><br>(Fused in sarcoma)               | RNA processing          | AD, AR      | Adult, juvenile | 5%     | <1%    | <1%   | FUS       | FTD            | 2,3   |
| <b>ALS10</b>       | 1p36.2    | <i>TARDBP</i><br>(TDP-43)                      | RNA processing          | AD          | Adult           | 5%     | <1%    | <1%   | TDP-43    | FTD            | 4-6   |
| <b>ALS9</b>        | 14q11.2   | <i>ANG</i><br>(Angiogenin)                     | Angiogenic activity     | AD          | Adult           |        |        |       | TDP-43    | PD             | 7     |
| <b>ALS11</b>       | 6q21      | <i>FIG4</i><br>(phosphoinositide phosphatase)  | Lipid metabolism        | AD          | Adult           |        |        |       |           | CMT4J          | 8     |
| <b>ALS12</b>       | 10p15-p14 | <i>OPTN</i><br>(Optineurin)                    | Multifunction           | AD, AR      | Adult           | 4%     | <1%    | -     | TDP-43    | POAG, PDB      | 9     |
| <b>ALS14</b>       | 9p13.3    | <i>VCP</i><br>(Valosin-containing protein)     | Protein quality control | AD          | Adult           | <1%    | <1%    | <1%   | TDP-43    | FTD, IBM, PDB  | 10    |
|                    | 12q24     | <i>DAO</i><br>(D-amino acid oxidase)           | Amino acid metabolism   | AD          | Adult           |        |        |       |           |                | 11    |
|                    | 17p13.2   | <i>PFN1</i><br>(Profilin)                      | Cytoskeleton            | AD          | Adult           |        |        |       |           |                | 12    |
| <b>ALS13</b>       | 12q24.12  | <i>ATXN2</i><br>(Ataxin-2)                     | RNA processing          | Risk factor | Adult           |        |        |       | TDP-43    | SCA2           | 13    |
|                    | 5q13.2    | <i>HNRNPA1</i><br>(hnRNP-A1)                   | RNA processing          | AD          | Adult           |        |        |       |           | MSP            | 14    |
|                    | 12q22.11  | <i>HNRNPA2B1</i><br>(hnRNP-A2/B1)              | RNA processing          | AD          | Adult           |        |        |       |           | MSP            | 14    |
| <b>PDB</b>         | 5q35.3    | <i>SQSTM1</i><br>(P62/sequestosome 1)          | Protein degradation     | AD          | Adult           |        |        |       |           | PDB            | 15,16 |
|                    | 21q12.2   | <i>EWSR1</i><br>(Ewing sarcoma break region 1) | RNA processing          | AD          | Adult           |        |        |       |           |                | 17    |
|                    | 17q12     | <i>TAF15</i><br>(TBP-associated factor)        | RNA processing          | AD          | Adult           |        |        |       |           |                | 18    |
| <b>ALS3</b>        | 18q21     | Unknown                                        | Unknown                 | AD          | Adult           |        |        |       |           |                | 19    |
| <b>ALS7</b>        | 20p13     | Unknown                                        | Unknown                 | AD          | Adult           |        |        |       |           |                | 20    |

Abbreviations: **AD**: autosomal dominant, **AR**: autosomal recessive, **XD**: X-linked dominant, **AOA2**: ataxia-ocular apraxia-2, **CMT4J**: Charcot-Marie-Tooth disease type 4J, **HSP**: hereditary spastic paraplegia, **IBM**: inclusion body myositis, **MSP**: multisystem proteinopathy, **PD**: Parkinson's disease, **PDB**: Paget's disease of the bone, **POAG**: Primary open angle glaucoma, **SCA2**: spinocerebellar ataxia type 2, **SMA**: spinal muscular atrophy

Supplemental table: Genetics and pathology of ALS and FTD (continued).

Ling et al (2013) Neuron

| Disease                                 | Locus    | Gene (protein)                                       | Protein function    | Heredity    | Onset               | fALS % | sALS % | FTD % | Pathology   | Other diseases      | Ref   |
|-----------------------------------------|----------|------------------------------------------------------|---------------------|-------------|---------------------|--------|--------|-------|-------------|---------------------|-------|
| <b>Atypical ALS</b>                     |          |                                                      |                     |             |                     |        |        |       |             |                     |       |
| <i>Juvenile onset, slow progression</i> |          |                                                      |                     |             |                     |        |        |       |             |                     |       |
| <b>ALS2</b>                             | 2q33.1   | <i>ALS2</i><br>(Alsin)                               | Vesicle trafficking | AR          | Infantile, juvenile |        |        |       |             | Infantile-onset HSP | 21    |
| <b>ALS5</b>                             | 15q15-21 | <i>SPG11</i><br>(Spatacsin)                          | Axonal transport    | AR          | Juvenile            |        |        |       |             | HSP                 | 22    |
| <b>ALS4</b>                             | 9q34.13  | <i>SETX</i><br>(Senataxin)                           | RNA processing      | AD          | Juvenile            |        |        |       |             | AOA2                | 23    |
| <i>Adult onset, slow progression</i>    |          |                                                      |                     |             |                     |        |        |       |             |                     |       |
| <b>ALS8</b>                             | 20q13.3  | <i>VAPB</i><br>(VAMP-associated protein)             | Vesicle trafficking | AD          | Adult               |        |        |       |             | Late-onset SMA      | 24    |
| <b>ALS with FTD</b>                     |          |                                                      |                     |             |                     |        |        |       |             |                     |       |
| <b>ALS-FTD</b>                          | 9q21-22  | <i>C9ORF72</i><br>(C9orf72)                          | Unknown             | AD          | Adult               | 25%    | 5%     | 10%   | TDP-43      |                     | 25,26 |
| <b>ALS-FTD</b>                          | 9p13.3   | <i>SIGMAR1</i><br>(Non-opioid receptor 1)            | Signal transduction | AD, AR      | Adult, juvenile     |        |        |       |             |                     | 27,28 |
| <b>ALS-FTD-X</b>                        | Xp11.21  | <i>UBQLN2</i><br>(Ubiquilin-2)                       | Protein degradation | XD          | Adult               | <1%    |        | <1%   | TDP-43, FUS |                     | 29    |
| <b>FTD</b>                              |          |                                                      |                     |             |                     |        |        |       |             |                     |       |
| <b>FTD</b>                              | 17Q21    | <i>MAPT</i><br>(Microtubule-associated protein, tau) | cytoskeleton        | AD          | Adult               |        |        | 10%   | Tau         |                     | 30    |
| <b>FTD-TDP</b>                          | 17q21.31 | <i>PGRN</i><br>(Progranulin)                         | Inflammation        | AD          | Adult               |        |        | 10%   | TDP-43      |                     | 31,32 |
| <b>FTD-3</b>                            | 3p11.2   | <i>CHMP2B</i><br>(Charged multivesicular protein 2B) | Vesicle trafficking | AD          | Adult               | <1%    |        | <1%   | P62         |                     | 33,34 |
| <b>FTD-TDP</b>                          | 7p21.3   | <i>TMEM106B</i><br>(Transmembrane protein 106B)      | Lysosome function   | Risk factor | Adult               |        |        |       |             |                     | 35    |

Abbreviations: **AD**: autosomal dominant, **AR**: autosomal recessive, **XD**: X-linked dominant, **AOA2**: ataxia-ocular apraxia-2, **CMT4J**: Charcot-Marie-Tooth disease type 4J, **HSP**: hereditary spastic paraplegia, **IBM**: inclusion body myositis, **MSP**: multisystem proteinopathy, **PD**: Parkinson's disease, **PDB**: Paget's disease of the bone, **POAG**: Primary open angle glaucoma, **SCA2**: spinocerebellar ataxia type 2, **SMA**: spinal muscular atrophy

## References for Supplemental Table:

1. Rosen, D.R. *et al.* Mutations in Cu/Zn superoxide dismutase gene are associated with familial amyotrophic lateral sclerosis. *Nature* **362**, 59-62 (1993).
2. Vance, C. *et al.* Mutations in FUS, an RNA processing protein, cause familial amyotrophic lateral sclerosis type 6. *Science* **323**, 1208-1211 (2009).
3. Kwiatkowski, T.J. *et al.* Mutations in the FUS/TLS gene on chromosome 16 cause familial amyotrophic lateral sclerosis. *Science* **323**, 1205-1208 (2009).
4. Sreedharan, J. *et al.* TDP-43 mutations in familial and sporadic amyotrophic lateral sclerosis. *Science* **319**, 1668-1672 (2008).
5. Kabashi, E. *et al.* TARDBP mutations in individuals with sporadic and familial amyotrophic lateral sclerosis. *Nat Genet* **40**, 572-574 (2008).
6. Van Deerlin, V.M. *et al.* TARDBP mutations in amyotrophic lateral sclerosis with TDP-43 neuropathology: a genetic and histopathological analysis. *The Lancet Neurology* **7**, 409-416 (2008).
7. Greenway, M.J. *et al.* ANG mutations segregate with familial and sporadic amyotrophic lateral sclerosis. *Nat Genet* **38**, 411-413 (2006).
8. Chow, C.Y. *et al.* Deleterious variants of FIG4, a phosphoinositide phosphatase, in patients with ALS. *Am. J. Hum. Genet.* **84**, 85-88 (2009).
9. Maruyama, H. *et al.* Mutations of optineurin in amyotrophic lateral sclerosis. *Nature* **465**, 223-226 (2010).
10. Johnson, J.O. *et al.* Exome sequencing reveals VCP mutations as a cause of familial ALS. *Neuron* **68**, 857-864 (2010).
11. Mitchell, J. *et al.* Familial amyotrophic lateral sclerosis is associated with a mutation in D-amino acid oxidase. *Proc. Natl. Acad. Sci. U.S.A.* **107**, 7556-7561 (2010).
12. Wu, C.-H. *et al.* Mutations in the profilin 1 gene cause familial amyotrophic lateral sclerosis. *Nature* (2012).
13. Elden, A.C. *et al.* Ataxin-2 intermediate-length polyglutamine expansions are associated with increased risk for ALS. *Nature* **466**, 1069-1075 (2010).
14. Kim, H.J. *et al.* Mutations in prion-like domains in hnRNPA2B1 and hnRNPA1 cause multisystem proteinopathy and ALS. *Nature* (2013).
15. Fecto, F. *et al.* SQSTM1 Mutations in Familial and Sporadic Amyotrophic Lateral Sclerosis. *Arch. Neurol.* **68**, 1440-1446 (2011).
16. Teyssou, E. *et al.* Mutations in SQSTM1 encoding p62 in amyotrophic lateral sclerosis: genetics and neuropathology. *Acta Neuropathol* **125**, 511-522 (2013).
17. Couthouis, J. *et al.* Evaluating the role of the FUS/TLS-related gene EWSR1 in amyotrophic lateral sclerosis. *Hum Mol Genet* **21**, 2899-2911 (2012).
18. Couthouis, J. *et al.* Feature Article: A yeast functional screen predicts new candidate ALS disease genes. *Proc. Natl. Acad. Sci. U.S.A.* **108**, 20881-20890 (2011).
19. Hand, C.K. *et al.* A novel locus for familial amyotrophic lateral sclerosis, on chromosome 18q. *Am. J. Hum. Genet.* **70**, 251-256 (2002).
20. Sapp, P.C. *et al.* Identification of two novel loci for dominantly inherited familial amyotrophic lateral sclerosis. *Am. J. Hum. Genet.* **73**, 397-403 (2003).
21. Hadano, S. *et al.* A gene encoding a putative GTPase regulator is mutated in familial amyotrophic lateral sclerosis 2. *Nat Genet* **29**, 166-173 (2001).
22. Daoud, H. *et al.* Exome sequencing reveals SPG11 mutations causing juvenile ALS. *Neurobiol. Aging* **33**, 839.e5-9 (2012).
23. Chen, Y.-Z. *et al.* DNA/RNA helicase gene mutations in a form of juvenile amyotrophic lateral sclerosis (ALS4). *Am. J. Hum. Genet.* **74**, 1128-1135 (2004).
24. Nishimura, A.L. *et al.* A mutation in the vesicle-trafficking protein VAPB causes late-onset spinal muscular atrophy and amyotrophic lateral sclerosis. *Am. J. Hum. Genet.* **75**, 822-831 (2004).
25. Renton, A.E. *et al.* A Hexanucleotide Repeat Expansion in C9ORF72 Is the Cause of Chromosome 9p21-Linked ALS-FTD. *Neuron* **72**, 257-268 (2011).
26. DeJesus-Hernandez, M. *et al.* Expanded GGGGCC Hexanucleotide Repeat in Noncoding Region of C9ORF72 Causes Chromosome 9p-Linked FTD and ALS. *Neuron* **72**, 245-256 (2011).
27. Luty, A.A. *et al.* Sigma nonopioid intracellular receptor 1 mutations cause frontotemporal lobar degeneration-motor neuron disease. *Ann Neurol.* **68**, 639-649 (2010).
28. Al-Saif, A., Al-Mohanna, F. & Bohlega, S. A mutation in sigma-1 receptor causes juvenile amyotrophic lateral sclerosis. *Ann Neurol.* **70**, 913-919 (2011).
29. Deng, H.-X. *et al.* Mutations in UBQLN2 cause dominant X-linked juvenile and adult-onset ALS and ALS/dementia. *Nature* **477**, 211-215 (2011).
30. Hutton, M. *et al.* Association of missense and 5'-splice-site mutations in tau with the inherited dementia FTDP-17. *Nature* **393**, 702-705 (1998).
31. Cruts, M. *et al.* Null mutations in progranulin cause ubiquitin-positive frontotemporal dementia linked to chromosome 17q21. *Nature* **442**, 920-924 (2006).
32. Barker, M. *et al.* Mutations in progranulin cause tau-negative frontotemporal dementia linked to chromosome 17. *Nature* **442**, 916-919 (2006).
33. Parkinson, N. *et al.* ALS phenotypes with mutations in CHMP2B (charged multivesicular body protein 2B). *Neurology* **67**, 1074-1077 (2006).
34. Skibinski, G. *et al.* Mutations in the endosomal ESCRTIII-complex subunit CHMP2B in frontotemporal dementia. *Nat Genet* **37**, 806-808 (2005).
35. Van Deerlin, V.M. *et al.* Common variants at 7p21 are associated with frontotemporal lobar degeneration with TDP-43 inclusions. *Nat Genet* **42**, 234-239 (2010).
